# Supplementary material for: Theoretical investigation of the donor group related electronic structure properties in push-pull organic sensitizers
Source: Royal Society of Chemistry journal article supplement (doi:10.1039/c3ra23374j), 2013-01-01
Supplement: c3ra23374j.pdf [file c3ra23374j.pdf]

*Electronic supplementary information*

**Theoretical investigation of the donor group related electronic structure properties in push-pull organic sensitizers**

**Jing Zhang,<sup>a</sup> Lin Yang,<sup>ab</sup> Min Zhang<sup>\*a</sup> and Peng Wang<sup>a</sup>**

<sup>a</sup>*Changchun Institute of Applied Chemistry, Chinese Academy of Sciences, Changchun 130022, China*

<sup>b</sup>*Graduate School, Chinese Academy of Sciences, Beijing, 100039, China*

E-mail: [min.zhang@ciac.jl.cn](mailto:min.zhang@ciac.jl.cn)

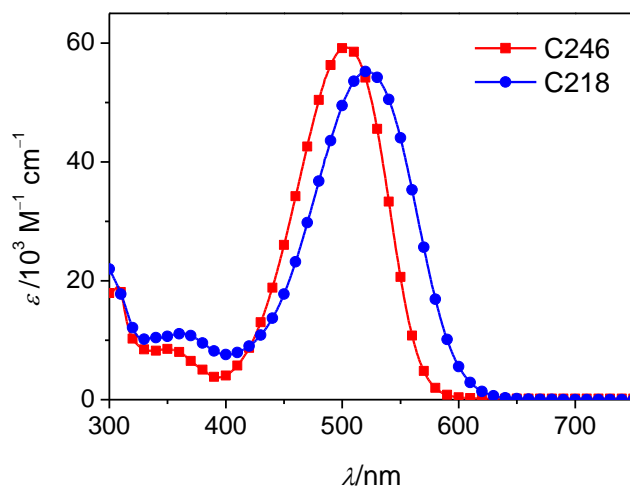

**Fig. S1** Electronic absorption spectra of C246 and C218 in THF recorded on an Agilent G1103A spectrometer. The synthesis of C246 and C218 was reported in our previous papers.<sup>S1,S2</sup>

**Table S1.** The calculated lowest excitation energies ( $E_{\text{exi}} > 200 \text{ nm}$ ) with inclusion of larger transition oscillator strengths ( $f > 0.1$ ).

| Dye  | Vacuum                     |        | THF solution               |        |
|------|----------------------------|--------|----------------------------|--------|
|      | $E_{\text{exi}}/\text{eV}$ | $f$    | $E_{\text{exi}}/\text{eV}$ | $f$    |
| C246 | 2.77                       | 1.4883 | 2.58                       | 1.6907 |
|      | 3.92                       | 0.1064 | 3.78                       | 0.1772 |
|      | 4.07                       | 0.1829 | 4.03                       | 0.1758 |
|      | 4.58                       | 0.1070 | 4.44                       | 0.1713 |
|      | 4.80                       | 0.1329 | 4.72                       | 0.1623 |
|      | 5.53                       | 0.7015 | 5.36                       | 0.1188 |
|      | 6.09                       | 0.2351 | 5.44                       | 0.8189 |
|      |                            |        | 5.93                       | 0.1161 |
|      |                            |        | 6.08                       | 0.1905 |
| C218 | 2.59                       | 1.5893 | 2.37                       | 1.7780 |
|      | 3.40                       | 0.1303 | 3.24                       | 0.1199 |
|      | 3.93                       | 0.2724 | 3.85                       | 0.2953 |
|      | 4.56                       | 0.1078 | 4.45                       | 0.1685 |
|      | 4.66                       | 0.2615 | 4.64                       | 0.1577 |
|      | 4.72                       | 0.1184 | 4.65                       | 0.4344 |
|      | 4.73                       | 0.1619 | 5.91                       | 0.1108 |
|      | 5.94                       | 0.1079 |                            |        |
| K201 | 2.57                       | 1.6897 | 2.37                       | 1.8569 |
|      | 3.27                       | 0.1879 | 3.12                       | 0.1500 |
|      | 3.83                       | 0.3937 | 3.75                       | 0.3147 |
|      | 3.86                       | 0.7733 | 3.76                       | 0.4050 |
|      | 4.41                       | 0.1505 | 3.84                       | 0.6915 |
|      | 4.87                       | 0.3144 | 4.34                       | 0.1945 |
|      | 5.16                       | 0.1283 | 4.47                       | 0.1482 |
|      |                            |        | 4.72                       | 0.1042 |
|      |                            |        | 4.84                       | 0.1368 |
|      |                            |        | 4.85                       | 0.1646 |
|      |                            |        | 5.15                       | 0.1210 |

Reference:

- [S1] M. Xu, D. Zhou, N. Cai, J. Liu, R. Li and P. Wang, *Energy Environ. Sci.*, 2011, **4**, 4735.
- [S2] R. Li, J. Liu, N. Cai, M. Zhang and P. Wang, *J. Phys. Chem. B*, 2010, **114**, 4461.
